# Supplementary material for: Increasing the Potential Effectiveness of Universal School Meals through Community- Engaged Implementation Mapping: A Qualitative Case Study
Source: Research Square preprint supplement (doi:10.21203/rs.3.rs-8902980/v1), 2026-04-19
Supplement: Supplementary file 1 [file 258bca1b704570fa97d59ed5.docx]

Table 7. Inductive Thematic Coding Scheme

|  |  |  | Inductive Coding Themes |  |
| --- | --- | --- | --- | --- |
| **Theme** | **Construct** | **Frequency** | **Definition** | **Quote** |
| Communication |  | 4 | Communication (or lack of) between the district, the school, families, and students and how this is discussed in the mapping process | I heard you from when you guys [at] our last meeting, which was about a month ago, and I really felt strongly we needed to do something with you guys. I've heard that you talked to a lot of people and some things didn't happen, and I just didn't want to continue to do that and fall and deaf ears. - District Food Service |
|  | Community Cohesion | 28 | Data reflects the degree to which there is cohesion between the school and the community e.g., parent involvement, alignment in mission and direction of the school meals program, etc. | One of the things that she was saying last time was that parents, want more education. Which I think I was definitely shying away from because I didn't want to be this overlord telling families what they should be cooking. Not that that would be the way it is, but it does seem like parents are interested in getting just more education. So it could probably make it a student and parent thing. I think that already is the case, but try to think about increasing the outreach and the actual education component around healthy eating. - School Administration |
|  | Bidirectional Learning | 9 | Inclusion of participants who are informed & uniformed on implementation mapping and school meal delivery. Instances of information exchange among participants for strengthening networks and systems. | So technically if you're promoting the program and you're instrumental in making sure that the meal program is being provided. For example, if you do breakfast in the classroom, that teacher is actually entitled to the breakfast because they're helping serve that meal. So that is actually what the regulation say. School Food Service: Oh, I didn't know that either. - District Food Service |
|  | Opportunities for Improvement | 14 | Miscommunications and areas for improvement in communication between the district and schools | We're trying to use social media that kids know. No kid knows about Zoom unless it was during the pandemic. But even with that someone would have to take over - Student |
|  | Marketing/Awareness | 16 | Any messaging around school meals that comes from implementers | For the parents, their not being aware of the menu, or these feedback sessions...maybe the timing and the scheduling or they don't know the feedback from the previous survey that was took in. So when they did the kickoff, I don't know the results that you all have on how the kids took the breakfast. So for me as a parent, I wouldn't know or give feedback on it because it wasn't mentioned, or I didn't really see that many people in the survey. Out of 70 students, maybe like five [participated], so what kind of data is that for us? - School Administration/Parent |
| Stigma and Social Drivers |  | 25 | Overarching challenge to implementation mapping/school meal implementation center on stigma | "[My child] says, "Mom, I don't want to take lunch today. I'm fine, I just won't eat lunch." And I'm like, "That's a problem." He's up at 6:00 all week to 2:00 and that's no food. He'll grab breakfast food but no lunch." - Parent "...They don't want to come in with their lunch, but most kids don't do that. They have different reasons why they don't want to eat lunch that day or why they don't want to eat the breakfast for a couple of different reasons. So they don't want to eat the lunch being provided. They don't want to bring lunch. So then they just starve until they get home." -Teacher |
|  | Food Perceptions | 25 | Perceptions of the food which are likely driven by social forces but still valid to document as separate from stigma | I'll do lunch bunch sometimes. And they go down and get their lunch and they come up and eat with me. And they'll be like, "Well I don't want lunch." I'm like, "Well go get it. I'll eat it." Because it is that stigma. And then once they actually go get it and bring it up, they'll eat it. But it's just the idea of they don't even give it a chance. - Teacher |
|  | Student Preferences & Culture | 15 | Presence (or lack of) meal options that reflect the cultural and taste preferences of the recipients; Student preferences that lead to meal avoidance. | District Food Service: So sometimes people, anybody thinks, they see breakfast items are cold, grab and go. If you see maybe a bar people think of that as not a full meal and that's not enough for me. So no one wants you to feel that way and maybe sometimes a hot meal is something that you would want, and I think that's where the line is. What would you rather have? Would you rather a hot meal for breakfast? Student 1: Rather a hot meal. Student 2: Hot meal. |
| Autonomy and Decision Making |  | 0 | Quotes related to autonomy demonstrated by participants, or leaders in strategy development and decision making |  |
|  | Implementer-driven Change | 60 | Strategies created by school staff to change the environment to be more suitable for students to have a comfortable eating experience. | Researcher: But I'm just curious, is there any wiggle room to make it so that some days they have [lunch after recess] ... I know we did some research in schools, kids would eat more when they had recess then lunch. I don't know if there's any ways to sort of flip that schedule. District Food Service: Well, they do talk about that, but the scheduling, is a huge district issue. |
|  | Recipient-driven Change | 18 | All students and caregivers who suggest ideas for strategies | So I was thinking about during this selection, a lot of the students were kind of chimed in. So I was thinking maybe we can have maybe students campaign for different things on the menu. Maybe rally up the students to get them excited. So it would be like presidents, like class presidents. We have seventh and eighth graders, they would campaign for better school lunches or better school menus or something like that. But to kind of get them involved as far as maybe a song, a theme song, a new name. Freebie is like, that was years ago. - Parent |
|  | Researcher facilitation | 6 | Research team supported for idea generation through giving suggestions or trying to help turn barriers into strategies | Last year, we observed some schools and literally kids had seven minutes to sit down and eat their food. It was different school to this one, but a lot of the time kids are like, "Well, I'm faced with a choice. I would rather play because time is so short." I know that we have a number of instructional minutes we have to get into every day. So where do you draw a line? But I'm just curious, is there any wiggle room to make it so that some days they have ... I know we did some research in schools, kids would eat more when they had recess then lunch. I don't know if there's any ways to sort of flip that schedule. - Researcher |
|  | Student Voice | 34 | Data representing the lack of inclusion of student voice and perspectives, efforts to prioritize their voices, and other pertinent data relating to student insights. | One thing I definitely have to say when it comes to drinks and juices. One thing I definitely realize is when it comes to the morning we only have plain milk and then juices. And then when it comes to lunch, it's either only chocolate milk or just regular milk. And even with that, one thing I don't completely comprehend is when it comes to the breakfast and the lunch, why is it always two different kinds of drinks or it's not the same exact drink. And even when it comes to water, I think in my opinion, the fact that we should at least have water bottles as an option because who wants to keep going up and going to get some water from the water fountain? It would be chaotic having so many students just go up to the water fountain. Even for the adults having so many people in one line just to get some water. - Student |
| Infrastructure/Material Barriers |  | 10 | Challenges or logistical barriers to implementing school meals; challenges with meal procurement and delivery of meals; limited funding and resources for implementation. | Administration: Well, ___ talked about not having the upgrade because the building was so... The structure was so old. But what about a mobile kitchen or something like that? Because they can pull up bag and kids can actually stand in line and order, or not stand in line because we know it's timely, but where parents can get involved. We can go up there, we can serve, but it's actually a kitchen on wheels and they can have hot food. The district has to think outside of the box. |
|  | Troubleshooting/Resource Pooling | 19 | Team approaches troubleshooting issues related to access to resources. | Administration: You see because she supports the food distribution and gives out the stuff, but the actual stuff to the classes, I don't feel like she does them as much this year as she did them in previous years. It used to be monthly, but I don't feel like she's been here monthly this year. District Staff: I think [ the organization] mentioned that they're a little short-staffed and had to reorganize some stuff that probably affected it, but I'm sure that they would... If we talk to Lauren, I'm sure we could get the support to make sure it's a monthly thing, and when we did talk about it, I think [the program manager] seemed like that was something she could do. |
|  | Power Dynamics | 24 | Overarching theme of empowerment which encompasses several sub themes | I think that I love how vocal our students have become and really... I love seeing how empowered they are. I think that if there is feedback that students or families have about food, I feel like the way that that feedback is given, there's no way to build on it or to change it. So thinking about preparing active participants, how can we get their input to, I guess, fall on the correct ears? I think that families and children obviously want there to be a sustainable, healthy food system at the school. And we have all these things happening in silos right now, and there's no way to connect how does the produce distributions and the food that we get from [partner organization] and all of that tie into the larger food system. So things like this, like involving parents I think is great, but also I think that as the leaders, we need help on how to tie that all together. -School Administration |
|  | Policy parameters | 22 | A significant amount of the mapping process focused on addressing "red tape" and constraints of the policy that schools must navigate, as many parts were unknown to representatives before | District Food Service: I hate to beat this person because I'm not this person in real life, I'm just a messenger. But, federal program, federal dollars that are very specific allowances that go with Fresh Fruit and Veggie Program. We were talking recently about, "Okay, how can we do dips?" I believe that cooking the foods is actually not allowable, but I have to double check on that. District Food Service: It's not supposed to, I remember. District Food Service: Which also is crazy because I'm sorry, a raw parsnip is... What are we doing here? It doesn't make sense. However, it's because of the logistics of getting the program out is my understanding. One of the things is maybe for the school specifically, can you rightfully do a tasting not from the Fresh Fruit and Veggie, but maybe with the ingredient?  School Administration: Kids are not going to pick up watermelon radishes and just eat them... So it would be great if on that day there was a dip or a dressing that they could put with it. Instead of putting it with breakfast, have it available at lunch and then [partner organization] would be outside and they could get a little cup of dip to go with it. |
