# Supplementary material for: Increasing the Potential Effectiveness of Universal School Meals through Community- Engaged Implementation Mapping: A Qualitative Case Study
Source: Research Square preprint supplement (doi:10.21203/rs.3.rs-8902980/v1), 2026-04-19

# WE NEED YOU!

Are you interested in representing your school community? Are you passionate about making change in your school?

**[SCHOOL NAME]**  
**[ DATE AND TIME]**

Your school involved in a project with the [School District] and [Research Organization] to improve school meals and we need you! We are looking for **students, parents, teachers, food service staff, climate staff, and administration** who are interested in representing their school and providing feedback on the school meals program at your school.

- 3 after-school meetings during the [Date] school year.
- Create strategies to improve student participation in school meals.
- Work with RISE team on strategies and share your thoughts.

Receive  
compensation  
of \$25  
for your  
participation in  
each meeting

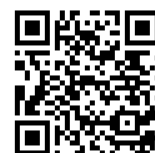

Supplement: Supplementary file 5 [file c568fb1a8938f67c926a0f2a.pdf]
