# Supplementary material for: Increasing the Potential Effectiveness of Universal School Meals through Community- Engaged Implementation Mapping: A Qualitative Case Study
Source: Research Square preprint supplement (doi:10.21203/rs.3.rs-8902980/v1), 2026-04-19
Supplement: Supplementary file 6 [file e1cac93102479f7c4ae18c82.docx]

Table 6. EPIS & GTE Code Relations

| **Code System** | **Increase Healthy Options - Barrier** | **Increase Healthy Options - Strategy** | **Reduce Deterrents - Barrier** | **Reduce Deterrents - Strategy** | **Community Capacity - Barrier** | **Community Capacity - Strategy** | **Social and Economic - Barrier** | **Social and Economic- Strategy** |
| --- | --- | --- | --- | --- | --- | --- | --- | --- |
| EPIS Constructs > Innovation Factors | 8 | Well, an idea is to to do a sample [food item] of that during lunch. That wouldn't be a problem for you to put it out and say, "This is on breakfast tomorrow," or, "This will be breakfast next week," or something like that, just so they know what it is. 'Cause especially for a breakfast item, when you see a calzone wrapped, it sometimes, we hear from some kids they really like it, but I've heard from others that they don't know what's inside so they don't want to try it. So those are items are great items to provide [for students to see], "Oh, that's on the menu." -Administration | 1 | There's definitely challenges in getting [equipment] in buildings...We just ran into a building a couple of hours ago where it doesn't seem like there's a water supply. So, making sure that if it was a fresh herb or fresh vegetable, that we had a place to clean and wash and prep those things. So we've also been talking about if we change to other possibilities of modeling where we do half pan and if that would be something that would work out in this school. - District Food Service | 0 | I think if we are planning for next year, then I would say, I'm still pushing for the [food] tasting beforehand. I just think that's important because it's set up differently. It'll be trays of food. It'll be served a little bit differently, just for a tasting. - Administration | 1 | 9 |
| EPIS Constructs > Bridging Factors | 3 | We have a school Instagram account. So maybe the teachers that are part of running that could do maybe a weekly food highlight with a picture and make it cute looking. -Administration | 0 | 1 | 2 | 6 | 3 | 8 |
| Inner Context > Individual Adopter Characteristics | 6 | Would you be able to encourage other students to give feedback? Some of your friends like, "Hey, take some time out and do a survey or give them feedback. That way they'll know what we like to eat. And then [food service] knows what you like and they can run it past their supervisor what you like." You take some time to do the survey. - Administrator Yeah, I'll take the time to do it. -Student | 3 | 6 | 2 | 3 | 3 | 3 |
| Inner Context > Culture - Inner | I feel like there's a lot of things working against the kids in school and eating. I think one of the reasons he doesn't want to bring a lunch is because I think the kids see it as being uncool. They don't want to come in with their lunch, but most kids don't do that. They have different reasons why they don't want to eat lunch that day or why they don't want to eat the breakfast for a couple of different reasons. So they don't want to eat the lunch being provided. They don't want to bring lunch. So then they just starve until they get home. -Teacher | But there's a stigma with the meals and I know the rules, but if teachers were able to get meals, I think that if the kids actually saw you eating it [they would participate] - Food Service Provider | [Previously] I had classroom assistants that would wait until the kids put stuff on the share table and the cafeteria manager would get upset if somebody came up and ate it before the kids had got them. What we had were classroom assistance who would look around the table and as soon as somebody sat something down, they grabbed it. And so that meant they had it before a child had opportunity to have it. -Principal | Is food talking with parents right now? If we're teaching our students about being healthy and or better snack options, we have to be related to home. So if we had a monthly cooking [event], where we go talk about challenges and/or parents interested in cooking make it an interest for the students; it could be a family engagement [opportunity] where we don't have to worry about childcare because we're using our students and our kids and our families to learn how to read a recipe, learn how to do math, and working together be good bonding to make a meal or a snack that we could also take back at home. - Administration | 3 | 7 | 3 | Sometimes the kids will come through the line and they don't want their food. Actually I walk around and find out who wants it and who don't want it and I give it to the person that wants it. And then especially on Fridays, if I have a little extra stuff, I have crates that I sit on this front table on this round table and I have extra snacks for them. So they might have extra bagels. - Food Service Provider |
| Inner Context > Organizational Capacity | 9 | I mean after we work out, whenever we're doing [the strategy], the sharing the meals with the staff, we would ask for volunteers and come up with a set of requirements, which I think is just easy that they would promote the school lunch program. [They] would be willing to from time to time, eat lunch with the students on a voluntary basi... we find out how many people we need and then how many people we can support and what we can do. If it's 20 meals a week, then we can do two people a day. - Administration | 2 | 3 | 0 | 6 | 6 | 6 |
| Outer Context > Service environment – School District & Vendors | 9 | And I think this one thing, that's one thing we could probably work on with the district is to be like, "Let's make this system more intuitive." (Researcher) It's not. It's not easy to figure out that you can review for that website - Administration | 0 | 1 | 0 | 4 | 1 | 1 |
| Outer Context > Service Environment – Policies | 6 | 2 | 1 | 2 | 0 | 0 | 5 | 1 |
| Outer Context > Funding | 2 | 1 | 0 | 0 | 0 | 1 | 2 | 3 |
| Outer Context > Leadership | 2 | 4 | 0 | 1 | 0 | 4 | 1 | 3 |
| Outer Context > Inter-organizational networks and partnerships | 1 | We wanted to add some enhancements to the menu, some fresh items and incorporate what's happening locally as much as possible. In talking to [our partners] and what they are able to produce, she's doing a lot of different things in different spaces and have received grant funding to start controlled environmental agriculture in various spaces. That is still under works, but they do grow produce and we were hoping to incorporate the farm that grows the produce into the menu in some ways. - District Staff | 2 | 0 | 1 | 7 | 3 | 7 |
| Outer Context > Culture | 0 | 1 | 0 | 0 | 0 | 1 | 0 | 0 |
| Outer Context > Responsiveness to School Community | 5 | 9 | 0 | 2 | 1 | 4 | 2 | 2 |
